Plasma proteome demonstrates sex-specific associations with mental health risks in adolescents

Alexey M. Afonin<sup>1</sup>, Aino-Kaisa Piironen<sup>1</sup>, Jordi Julvez<sup>2,3,4</sup>, Irene van Kamp<sup>5</sup> and Katja M. Kanninen<sup>1\*</sup>.

<sup>1</sup>A.I. Virtanen Institute for Molecular Sciences, University of Eastern Finland, Kuopio, Finland.

<sup>2</sup>Clinical and Epidemiological Neuroscience (NeuroÈpia), Institut d'Investigació Sanitària Pere Virgili (IISPV), 43204 Reus, Spain.

<sup>3</sup>ISGlobal, Barcelona, Spain.

<sup>4</sup>CIBER Epidemiología y Salud Pública (CIBEREsp), Madrid, Spain

<sup>5</sup>Centre for Sustainability, Environment and Health, National Institute for Public Health and the Environment, Bilthoven, the Netherlands.

\*corresponding author

Email: [katja.kanninen@uef.fi](mailto:katja.kanninen@uef.fi)

Phone: +358 46 921 0065

Address: Neulaniementie 2, Kuopio, 70210, Finland

## Abstract

Adolescence is a critical developmental period marked by significant physiological, psychological, and behavioural changes. Sex-specific biological factors can play a major role in their progression. Liquid chromatography – tandem mass spectrometry proteomic analysis was used to measure the plasma proteome abundances in 197 adolescents (11-16 years old) from the WALNUTs cohort. Orthogonal partial least squares discriminant analysis (OPLS-DA) revealed clear sex-based proteomic distinctions, with 76 proteins significantly differing between males and females after correcting for age and BMI. Gene Ontology enrichment analysis of these proteins highlighted pathways related to cell adhesion and extracellular matrix organization reflecting sex-specific developmental trajectories during puberty. Bioinformatic analysis revealed 37 proteins significantly associated with the total score of the Strengths and Difficulties Questionnaire (SDQ), with additional sex-specific associations emerging in subgroup analyses. Plasma protein abundances in males exhibited stronger correlations with SDQ externalizing subscale scores, while in females the associations with the internalizing score were more prominent, consistent with known behavioural sex differences. Immune response and blood coagulation pathways were implicated in these associations, particularly in females, while no significant pathway enrichment was observed for males. These findings highlight both shared and sex-specific proteomic features associated with the SDQ scores in adolescents, emphasising the need to consider sex differences in proteomic studies. The results provide a critical step toward identifying biomarkers and pathways underlying sex-specific psychological and developmental processes in adolescence.

## Introduction

Adolescence is a critical developmental period characterised by profound physiological, hormonal, and metabolic changes, many of which are sex specific. These changes have long-term implications for health and disease trajectories, making it a crucial time to explore biological differences between females and males. As is the case with many diseases, sex also plays a role in mental health. For instance, depression and anxiety disorders are among the most prevalent mental health conditions worldwide, with significant sex differences observed in their prevalence, manifestation, and treatment responses[1]. Epidemiological studies consistently report that women can be more than twice as likely as men to experience depression and anxiety disorders [2–4]. Men, while exhibiting lower reported rates of these disorders, may underreport symptoms due to social stigma and are more likely to suffer from other problems, such as substance abuse[1].

The Strengths and Difficulties Questionnaire (SDQ) is a widely used screening tool assessing behavioural and emotional difficulties in children and adolescents across five domains: emotional symptoms, conduct problems, hyperactivity/inattention, peer relationship problems, and prosocial behaviour [5–7]. The psychological measures such as the SDQ and the general psychopathology factor (p-factor) can both be influenced by the sex of the participant. Understanding these differences is crucial for accurate diagnosis, intervention, and support across developmental stages [8]. Boys tend to exhibit higher scores in hyperactivity/inattention and conduct problems, reflecting a greater prevalence of externalizing behaviours [9, 10]. In contrast, girls often score higher in emotional symptoms and peer relationship problems, indicating a tendency toward internalizing issues [11]. These differences may be attributed to biological factors, socialization processes, and gender norms influencing the expression and reporting of psychological symptoms [12]. Sex-associated differences in mental disorders were reported in multiple papers using different OMIC technologies [13–16].

The plasma proteome can provide important insights into health and disease, but also into differences between the sexes. Several studies have identified plasma proteins with significantly different levels between adult females and males[17–19]. For instance, the apolipoproteins, integral to lipid transport and metabolism, often display sex-specific variations. Higher levels of apolipoprotein A-I have been observed in females, potentially offering protection against cardiovascular diseases[17]. Conversely, males may exhibit higher levels of proteins associated with inflammatory responses, such as C-reactive protein (CRP), a known risk marker for cardiovascular events [20]. A study of circulating cardiometabolic-related proteins associated with the risk of incident myocardial infarction revealed significant sex-specific differences. Among over 11,000 Swedish adults, 45 proteins were linked to MI risk, with 13 showing sex-specific associations—most prominently among women [21]. The immune system generally exhibits notable sex-specific characteristics: females generally mount stronger innate and adaptive immune responses than males, which is thought to contribute to the increased prevalence of autoimmune diseases in women[22]. Proteins such as interferons, interleukins, and immunoglobulins may be differentially expressed, influencing immune cell function and signalling pathways [23].

Sex-specific differences in mental health have been increasingly revealed through proteomics and other omics studies, highlighting distinct molecular mechanisms underlying psychiatric disorders between males and females. For instance, an untargeted proteomic analysis identified sex-specific

biological abnormalities in late-life depression, finding 33 proteins uniquely associated with depression in females—primarily related to immunoinflammatory control—and 6 unique proteins in males, affecting a broader range of biological pathways [24]. Similarly, a metabolomics study in children and adolescents with major depressive disorder identified sex-specific plasma biomarkers, with biliverdin as a male-specific biomarker and phosphatidylcholine as a female-specific biomarker [14]. Genomic studies further support these findings; for example, Labonté et al. discovered sex-specific transcriptional signatures in depression, demonstrating different gene expression patterns in males and females [25]. These insights underscore the importance of considering sex as a critical variable in mental health research, with significant implications for developing personalised diagnostic tools and therapeutic interventions tailored to sex-specific biological profiles.

Most studies thus far have concentrated on assessing sex-specific plasma protein levels in adults, and relatively little is known about the situation in adolescents. A longitudinal study of plasma proteome of children and adolescents showed multiple proteins to be significantly different between males and females, including Anti-mullerian hormone and multiple insulin growth factors [26].

We have previously shown that the total score of the SDQ is associated with changes in the plasma proteome in adolescents [27]. In another study we also showed association of plasma proteins with the p-factor [28]. These papers show plasma proteins to be a legitimate way of investigating questionnaire-based mental wellness scores. Adjusting for sex in modelling is a routine method, based on the assumption of sex specific plasma differences, however, the influence of sex in these associations have not been previously directly addressed. Here we aimed to systematically investigate the sex-specific associations between plasma protein abundances and the SDQ scores in adolescents. By employing advanced proteomic techniques and bioinformatic analyses, we identified several plasma proteins that were differentially expressed between female and male adolescents. We also found proteins that associated with the SDQ score, and its externalizing of internalizing subscales exclusively in either males or females.

## Methods

### Participant recruitment and sample collection

The studies were reviewed and approved by CEIC Parc Salut Mar Clinical Research Ethics Committee (approval numbers: 2015/6026 Walnuts and 2020/9688–Equal-life). Written informed consent to participate in the original WALNUTs study was provided by the participants' legal guardian/next of kin. No additional consent was needed for this study, all the participants were offered free tickets to the science museum of Barcelona. The specifics of the Walnuts cohort formation were described in previous publications [29, 30]. The current manuscript used a subset of 372 baseline blood samples before any dietary intervention originally described in a previous work [30]. For this study, a cross-sectional sub-group of 197 samples was used to perform the proteomics analysis. Samples were drawn by a nurse using K2EDTA plus tubes, rested for one hour then centrifuged at 2500 x g for 20 min at 20°C, refrigerated at 4°C, and frozen to -80°C within 4 h after extraction[30], stored at -80°C, and were not thawed until the protein depletion was performed prior to the proteomics analysis. The self-reported SDQ scores were used to assess the psychosocial status reflecting the risk of mental health issues (Table 1).

**Table 1:** Demographic information of the subjects in the study.

|                                               | Males      | Females     |
|-----------------------------------------------|------------|-------------|
| <b>Sample size</b>                            | 111        | 86          |
| <b>SDQ total score</b> (mean ± s.d.)          | 10 ± 5.7   | 10.19 ± 5.7 |
| <b>SDQ externalizing score</b> (mean ± s.d.)  | 6.4 ± 3.8  | 5.7 ± 3.9   |
| <b>SDQ internalising score</b> (mean ± s.d.)  | 3.8 ± 2.4  | 4.4 ± 3.0   |
| <b>Age</b> (years) (mean ± s.d.)              | 13.8 ± 0.9 | 14.0 ± 0.9  |
| <b>BMI</b> (kg/m <sup>2</sup> ) (mean ± s.d.) | 20.5 ± 3.4 | 21.0 ± 3.2  |

n = number of samples; s.d. = standard deviation, SDQ = the Strength and Difficulties Questionnaire, BMI = body mass index (kg/m<sup>2</sup>)

### Proteome analysis

The specifics of the analysis of the first 91 samples are presented in [28]. The analysis specifics for the second part of the cohort were as follows. The second analysis batch contained 120 samples, 106 of them new, and 14 previously analysed samples.

Albumin and IgG represent more than 70% of total protein levels in human plasma samples [31]. Therefore, the depletion of high-abundant proteins is essential to the identification and analysis of low-abundant proteins. The plasma samples were depleted from highly abundant plasma proteins with Thermo Scientific Top14 Abundant Protein Depletion Resin according to manufacturer instructions. The proteins of depleted samples were acetone precipitated. Precipitated proteins were dissolved in 8 M urea in 50 mM Tris-HCl, pH 8. Samples were reduced with 10 mM D,L-dithiothreitol and alkylated with 40 mM iodoacetamide. Samples were digested overnight with sequencing grade modified trypsin (Promega). After digestion peptide samples were desalted with

a Sep-Pak tC18 96-well plate (Waters) and evaporated to dryness. Samples were dissolved in 0.1% formic acid and peptide concentration was determined with a NanoDrop device. For DIA analysis 800 ng of peptides were injected and analysed in random order. Wash runs were submitted between each sample to reduce potential carry-over of peptides. 1.3 LC-ESI-MS/MS Analysis The LC-ESI-MS/MS analysis was performed on a nanoflow HPLC system (Easy-nLC1200, Thermo Fisher Scientific) coupled to the Orbitrap Exploris 480 mass spectrometer (Thermo Fisher Scientific, Bremen, Germany) equipped with a nano-electrospray ionisation source and FAIMS interface. Compensation voltages of -40 V and -60 V were used. Peptides were first loaded on a trapping column and subsequently separated inline on a 15 cm C18 column (75  $\mu$ m x 15 cm, ReproSil-Pur 3  $\mu$ m 120 Å C18-AQ, Dr. Maisch HPLC GmbH, Ammerbuch-Entringen, Germany). The mobile phase consisted of water with 0.1% formic acid (solvent A) or acetonitrile/water (80:20 (v/v)) with 0.1% formic acid (solvent B). A 120 min gradient was used to elute peptides (62 min from 5 % to 21 % solvent B followed by 48 min from 21 % to 36 % solvent B and in 5 min from 36% to 100% of solvent B, followed by 5 min wash stage with solvent B). Samples were analysed by a data independent acquisition (DIA) LC-MS/MS method. MS data was acquired automatically by using Thermo Xcalibur 4.6 software (Thermo Fisher Scientific). In a DIA method a duty cycle contained one full scan (400 -1000 m/z) and 30 DIA MS/MS scans covering the mass range 400 -1000 with variable width isolation windows.

### **Protein identification and quantification analysis**

Data analysis consisted of protein identifications and label free quantifications of protein abundances. Data was analysed by Spectronaut software (Biognosys; version 18.0.2). The direct DIA approach was used to identify proteins and label-free quantifications were performed with the MaxLFQ algorithm in Spectronaut. Main data analysis parameters in Spectronaut were: (i) Enzyme: Trypsin/P; (ii) up to 2 missed cleavages (iii) Fixed modifications: Carbamidomethyl (cysteine); (iv) Variable modifications: Acetyl (protein N-terminus) and oxidation (methionine); (v) Precursor FDR Cutoff: 0.01 (vi) Protein FDR Cutoff: 0.01 (vii) Quantification MS level: MS2 (viii) Quantification type: Area under the curve within integration boundaries for each targeted ion (iv) Protein database: Swiss-Prot 2022\_05 Homo Sapiens [32], Universal Protein Contaminant database [33]; and (v) Normalisation: Global median normalization. All the peptides were used for quantification.

### **Bioinformatic data analysis**

To simplify the comparisons, the second analysis batch contained 10 of the same samples, as the first run. The two cohorts were treated as two batches in ComBat batch correction algorithm. The results of the batch correction are presented in Supplementary Figure 1. Data pre-processing and statistical analyses were performed using R (version 4.4.1.). Identified proteins with more than 20% missing values were excluded from the analysis. Sample normalisation was performed using the medianCentering method from the proBatch package [34]. Missing values remaining in the dataset were inputted using the Sample Minimum method, as the most reliable one [35, 36]. Proteins depleted prior to MS analysis that were considered a possible source of bias and thus were excluded.

For the differential abundance analysis limma (v. 3.54.2) [37] package was used, with the SDQ score utilised as a continuous variable. The sex and age of adolescents were included in the linear model to ensure that the proteins reported were associated with SDQ and were not influenced by confounding factors. The differences in protein abundances were expressed as Log<sub>2</sub> fold change

(ratio of the means of raised (numerator) and low (denominator) SDQ groups). The p-values were adjusted using Benjamini-Hochberg (BH) procedure.

Plasma proteomic datasets from adolescents represent a very low number of all the proteomic datasets [31], so to better investigate the functional enrichment the full list of all proteins found in this study was used as the background gene list in the enrichment analyses. To characterise the enriched pathways related to the identified proteins, significantly differently abundant proteins (adj.  $p \leq 0.05$ ) were used in further bioinformatic data analyses. The p-value was adjusted using the BH method. The STRINGdb package was used to retrieve the protein-protein interaction information for the significantly differentially abundant proteins from the STRING database (v. 12) [38] and perform enrichment analysis [39]. Result visualisations were performed using ggplot2 (v3.4.0) [40] package.

## Results

### Protein identification

Mass spectrometry-based proteomics was used to successfully identify 2803 proteins in the WALNUTs plasma samples (mean of 1414 proteins per sample, SD=176). The full list of the proteins is presented in Supplementary File 1. Out of these we removed 119 proteins identified as contaminants or a possible source of bias. Only proteins detected in at least 80% of the samples were used for all the subsequent analyses (N = 802).

### Analysis of sex differences in the plasma proteome

For orthogonal partial least squares discriminate analysis (OPLS-DA), all proteins of the subjects were utilised. Male and female subjects were distinctly separated in the OPLS-DA plot, indicating satisfactory reproducibility (Fig 1). OPLS-DA plot demonstrated the following measures: Q2Y cumulative = 0.494, R2Y cumulative = 0.852. Sex therefore serves as a reliable separating factor between the plasma proteomes of adolescents in the WALNUTs cohort.

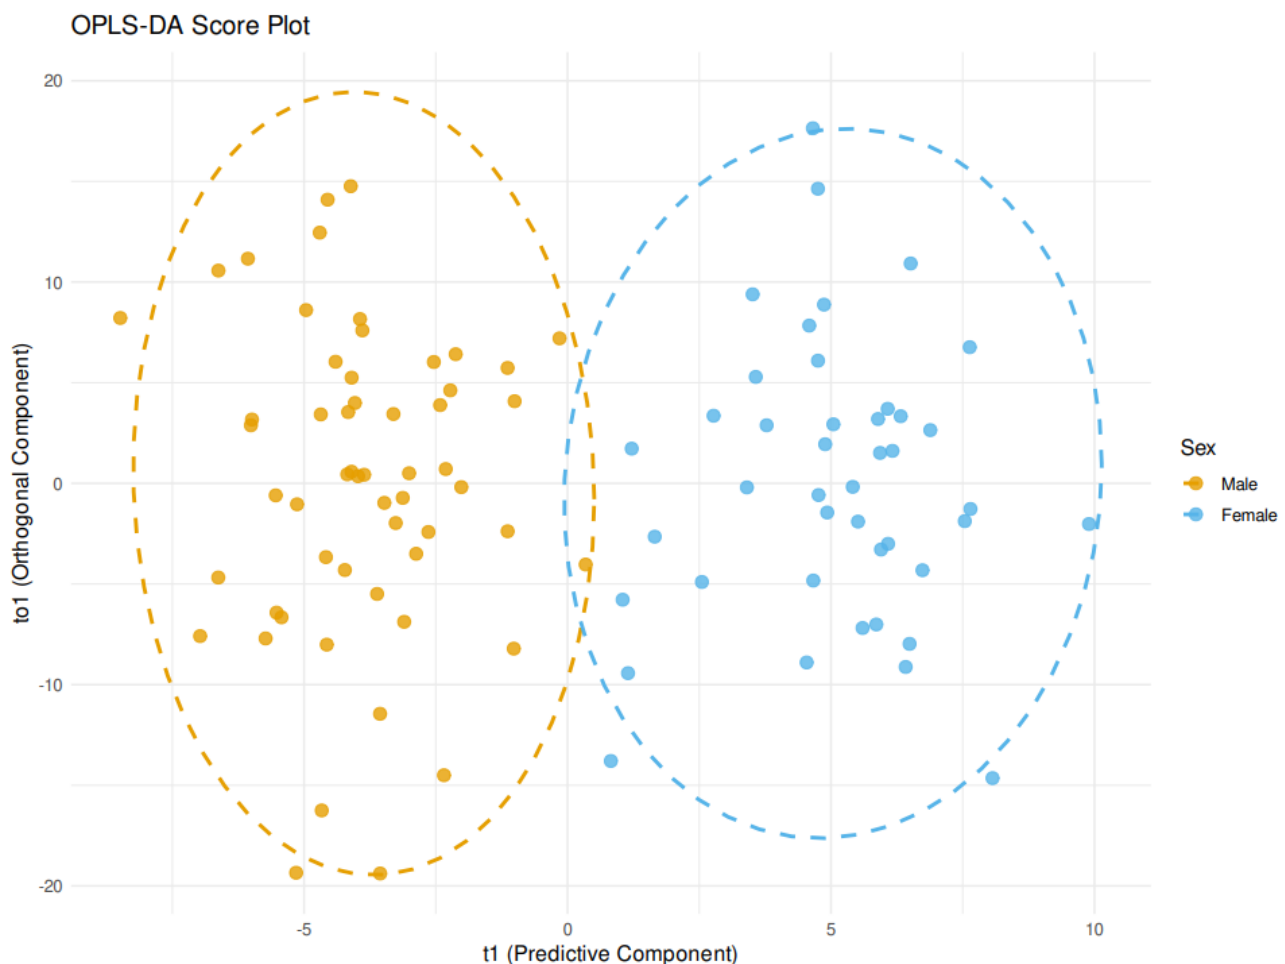

**Figure 1.** OPLS-DA analysis shows a clear separation of the plasma proteome between the female and male plasma proteomes. Orange colour indicates females and blue indicates males.



To assess the influence of sex on the proteome we used linear modelling with limma. Correcting for age and BMI, linear modelling showed 76 proteins to be different between sexes (Supplementary Table 1). Enrichment analysis for the 76 proteins using Gene Ontology (GO) terms showed that the most significantly enriched categories were cell adhesion, collagen fibril organisation, extracellular matrix organisation, anatomical structure morphogenesis and ossification.

Out of the significant sex-specifically altered plasma proteins (Supplementary Table 1), Vitronectin, Prothrombin, Ficolin 2, and Alpha-1B-Glycoprotein were previously reported to be associated with the SDQ score in adolescents [27]. We therefore split the WALNUTs cohort samples by sex and investigated the sex-specific differences related to the total SDQ score.

### Proteins significantly associated with the full cohort

The full WALNUTs cohort was used to identify the proteins significantly associated with SDQ. We identified 37 proteins to be significantly associated (adjusted p-value < 0.05) with the total SDQ score in this work (Table 3). As splitting the cohort by sex leads to lowered statistical power, we opted to report the nominal p-values for sex-specific analyses (Table 2).

**Table 2.** Proteins associated with SDQ.

| Protein ID    | Protein names                               | Full cohort |         |                | Males       |         | Females     |         |
|---------------|---------------------------------------------|-------------|---------|----------------|-------------|---------|-------------|---------|
|               |                                             | Size effect | P.Value | Adjusted P.Val | Size effect | P.Value | Size effect | P.Value |
| <b>O15511</b> | Actin-related protein 2/3 complex subunit 5 | -0.1346     | 0.0013  | 0.0360         | -<br>0.1762 | 0.0047  | -           | -       |
| <b>O43895</b> | Xaa-Pro aminopeptidase 2                    | -0.1190     | 0.0022  | 0.0491         | -<br>0.1395 | 0.0112  | -           | -       |
| <b>O95445</b> | Apolipoprotein M                            | 0.0199      | 0.0009  | 0.0309         | -           | -       | 0.0292      | 0.0024  |
| <b>P00450</b> | Ceruloplasmin                               | 0.0285      | 0.0001  | 0.0068         | 0.0185      | 0.0379  | 0.0384      | 0.0011  |
| <b>P00734</b> | Prothrombin                                 | 0.0242      | 0.0010  | 0.0322         | -           | -       | 0.0469      | 0.0000* |
| <b>P01008</b> | Antithrombin-III                            | 0.0280      | 0.0000  | 0.0010         | -           | -       | 0.0439      | 0.0000* |
| <b>P01833</b> | Polymeric immunoglobulin receptor           | -0.0711     | 0.0000  | 0.0031         | -<br>0.0737 | 0.0009  | -0.0678     | 0.0051  |
| <b>P02746</b> | Complement C1q subcomponent subunit B       | 0.0210      | 0.0012  | 0.0352         | -           | -       | 0.0270      | 0.0057  |
| <b>P02763</b> | Alpha-1-acid glycoprotein 1                 | 0.0352      | 0.0013  | 0.0360         | 0.038       | 0.0103  | -           | -       |
| <b>P03951</b> | Coagulation factor XI                       | 0.0290      | 0.0002  | 0.0122         | -           | -       | 0.0421      | 0.0008  |
| <b>P04003</b> | C4b-binding protein alpha chain             | 0.0278      | 0.0002  | 0.0122         | 0.0205      | 0.0351  | 0.0341      | 0.0039  |
| <b>P04217</b> | Alpha-1B-glycoprotein                       | 0.0202      | 0.0009  | 0.0301         | 0.0178      | 0.0381  | 0.0231      | 0.0105  |
| <b>P05154</b> | Plasma serine protease inhibitor            | 0.0274      | 0.0020  | 0.0467         | -           | -       | 0.0442      | 0.0018  |
| <b>P05155</b> | Plasma protease C1 inhibitor                | 0.0270      | 0.0000  | 0.0051         | 0.018       | 0.0411  | 0.0360      | 0.0003  |
| <b>P05156</b> | Complement factor I                         | 0.0221      | 0.0022  | 0.0491         | -           | -       | 0.0276      | 0.0092  |
| <b>P05160</b> | Coagulation factor XIII B chain             | 0.0234      | 0.0023  | 0.0491         | -           | -       | 0.0380      | 0.0029  |
| <b>P08603</b> | Complement factor H                         | 0.0249      | 0.0001  | 0.0107         | -           | -       | 0.0370      | 0.0003  |

|               |                                                             |         |        |        |             |         |         |        |
|---------------|-------------------------------------------------------------|---------|--------|--------|-------------|---------|---------|--------|
| <b>P09603</b> | Macrophage colony-stimulating factor 1                      | -0.1231 | 0.0004 | 0.0189 | -<br>0.1217 | 0.0133  | -0.1335 | 0.0078 |
| <b>P12955</b> | Xaa-Pro dipeptidase                                         | 0.0292  | 0.0006 | 0.0228 | -           | -       | 0.0422  | 0.0060 |
| <b>P20851</b> | C4b-binding protein beta chain                              | 0.0296  | 0.0002 | 0.0122 | -           | -       | 0.0422  | 0.0015 |
| <b>P20908</b> | Collagen alpha-1                                            | -0.1074 | 0.0001 | 0.0107 | -<br>0.0865 | 0.0150  | -0.1282 | 0.0045 |
| <b>P31150</b> | Rab GDP dissociation inhibitor alpha                        | -0.0965 | 0.0017 | 0.0421 | -<br>0.1251 | 0.0114  | -       | -      |
| <b>P35542</b> | Serum amyloid A-4 protein                                   | 0.0222  | 0.0006 | 0.0228 | -           | -       | 0.0274  | 0.0067 |
| <b>P43251</b> | Biotinidase                                                 | 0.0300  | 0.0001 | 0.0113 | 0.0231      | 0.0274  | 0.0378  | 0.0024 |
| <b>P46531</b> | Neurogenic locus notch homolog protein 1                    | -0.0299 | 0.0010 | 0.0322 | -<br>0.0394 | 0.0032  | -       | -      |
| <b>P51693</b> | Amyloid beta precursor like protein 1                       | -0.0736 | 0.0005 | 0.0211 | -0.084      | 0.0028  | -       | -      |
| <b>P55287</b> | Cadherin-11                                                 | -0.1232 | 0.0000 | 0.0051 | -<br>0.1224 | 0.0053  | -0.1219 | 0.0025 |
| <b>P55899</b> | IgG receptor FcRn large subunit p51                         | -0.1341 | 0.0014 | 0.0360 | -<br>0.1712 | 0.0043  | -       | -      |
| <b>P69891</b> | Hemoglobin subunit gamma-1                                  | -0.1559 | 0.0012 | 0.0352 | -<br>0.1598 | 0.0245  | -0.1532 | 0.0168 |
| <b>Q04760</b> | Lactoylglutathione lyase                                    | -0.1422 | 0.0002 | 0.0122 | -<br>0.1254 | 0.0168  | -0.1589 | 0.0061 |
| <b>Q15485</b> | Ficolin-2                                                   | 0.0352  | 0.0003 | 0.0133 | 0.0393      | 0.0019  | 0.0315  | 0.0409 |
| <b>Q16627</b> | C-C motif chemokine 14                                      | -0.0936 | 0.0002 | 0.0122 | -<br>0.0994 | 0.0045  | -0.0858 | 0.0222 |
| <b>Q6ZP82</b> | Coiled-coil domain-containing protein 141                   | -0.1692 | 0.0000 | 0.0006 | -<br>0.1804 | 0.0003  | -0.1386 | 0.0025 |
| <b>Q86SF2</b> | N-acetylgalactosaminyltransferase 7                         | -0.1210 | 0.0000 | 0.0035 | -<br>0.1553 | 0.0001* | -0.0884 | 0.0333 |
| <b>Q9H1U4</b> | Multiple epidermal growth factor-like domains protein 9     | -0.0414 | 0.0005 | 0.0211 | -<br>0.0569 | 0.0009  | -       | -      |
| <b>Q9NSC7</b> | Alpha-N-acetylgalactosaminide alpha-2,6-sialyltransferase 1 | -0.1349 | 0.0003 | 0.0147 | -<br>0.1649 | 0.0015  | -       | -      |
| <b>Q9Y696</b> | Chloride intracellular channel protein 4                    | -0.1352 | 0.0017 | 0.0424 | -<br>0.1695 | 0.0074  | -       | -      |

The proteins significant with BH correction are denoted with \*

Comparing the list of significant proteins to the sex-specific lists, we see that 15 of the 37 proteins are associated with the full SDQ score in both sexes, 10 are associated only in males, and 12 only in females. Interestingly, only 4 proteins were nominally associated with SDQ in the split analysis, but not in the full cohort (Figure 2).

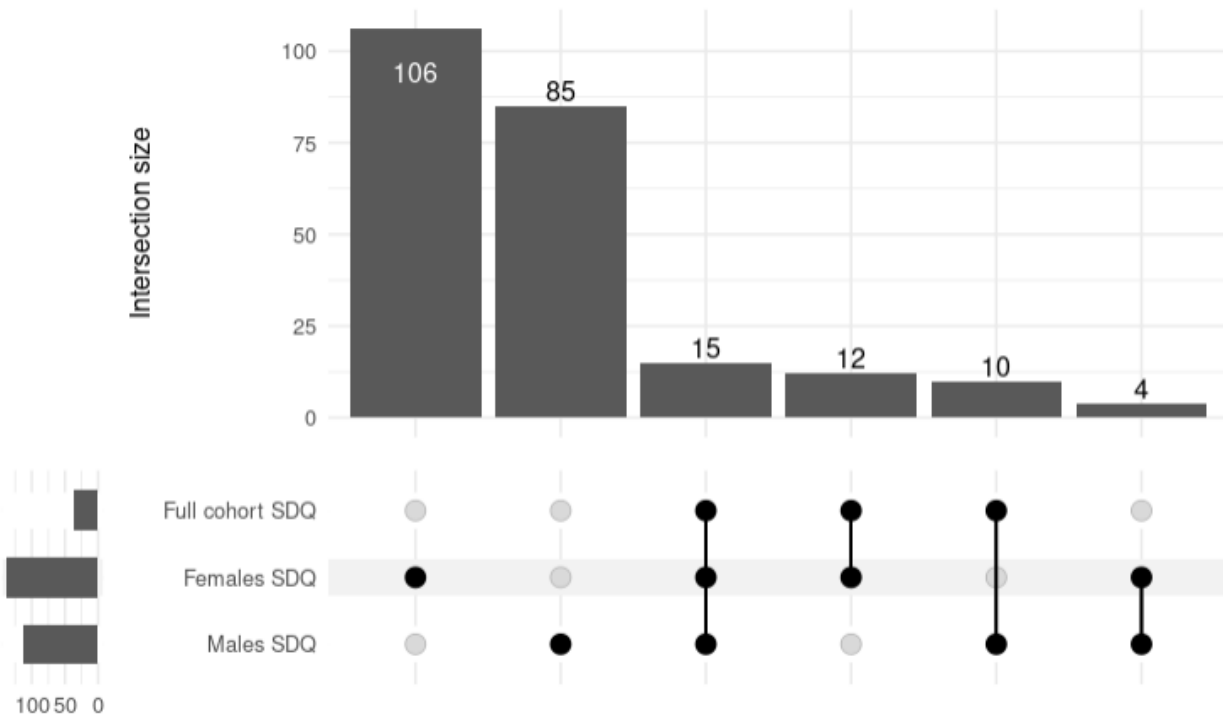

**Figure 2.** UpSet plot showing the intersections between the set of protein associated with SDQ in the full cohort and in two subsets.

### Protein-protein interactions and enrichment analysis

To predict protein-protein interactions, we next carried out STRING analyses on the 37 DEPs associated with the total SDQ score in the full WALNUTs cohort. The interaction map for the entire cohort, and females and males separately are presented in Figure 3.

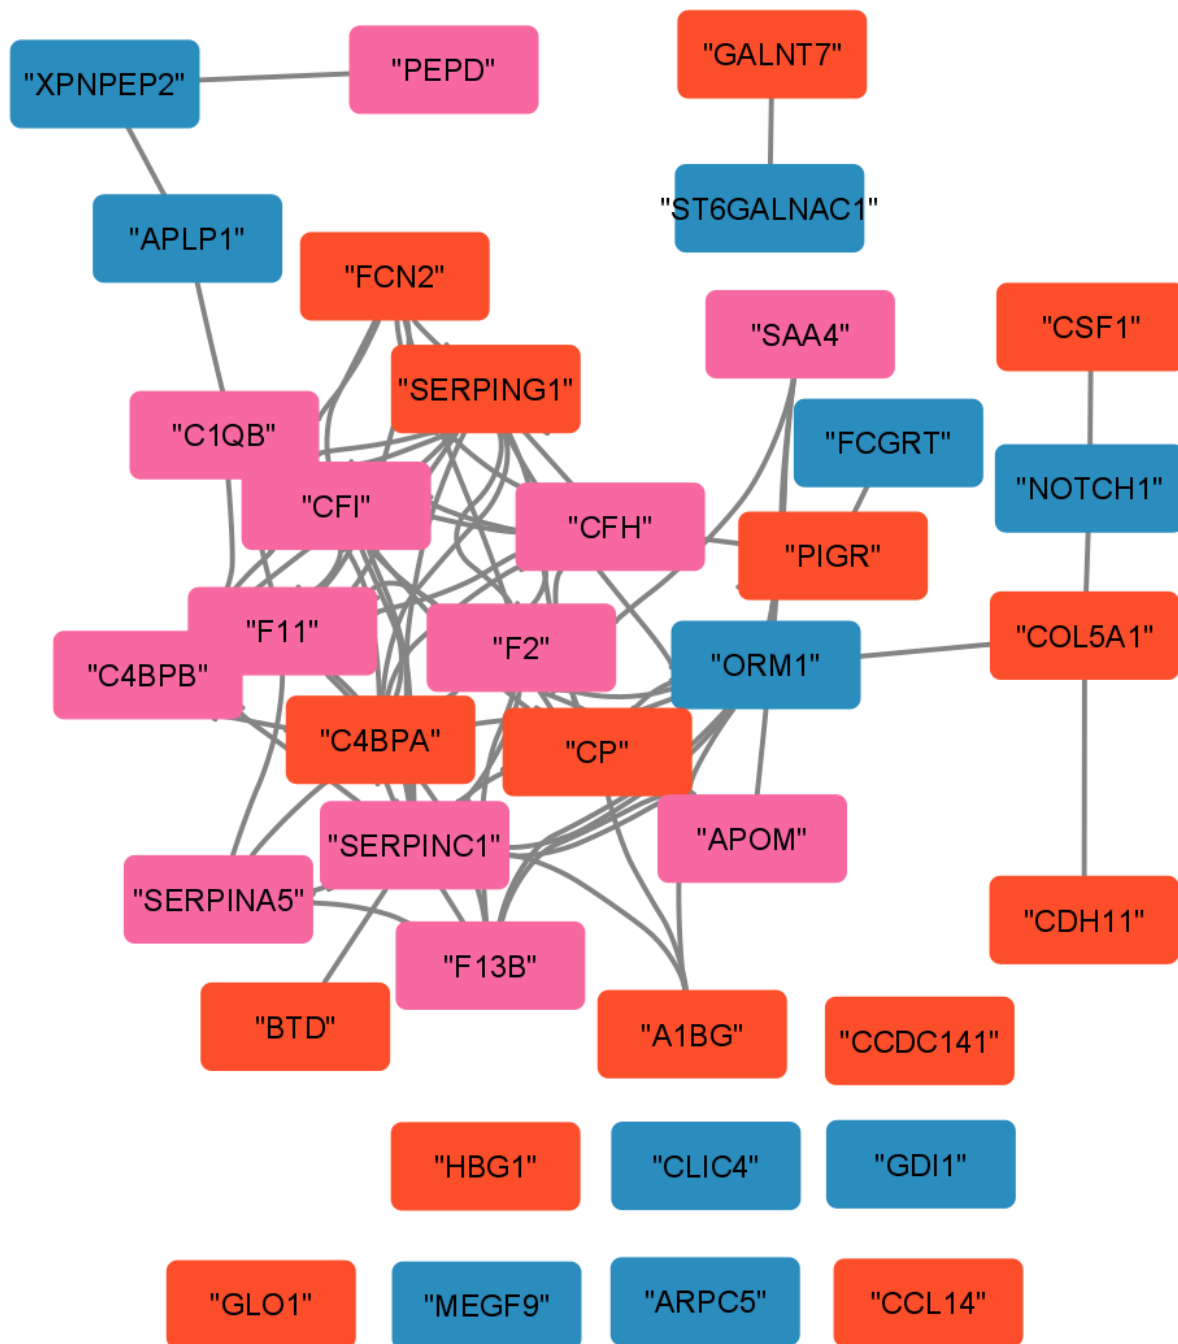

**Figure 3.** The STRING interaction networks of the proteins, significantly associated with the total SDQ score in the full WALNUTs cohort. The red proteins are those changed in both females and males. Pink boxes denote proteins that are specifically altered only in females and blue denote proteins specifically altered only in males.

We performed enrichment analysis on the three groups indicated in the Figure 3. Only proteins characteristic to the female subset showed significant enrichment the enriched categories included blood microparticles and complement and coagulation cascade. No significant enrichment was found for the other two groups.

#### **Analysis of sex differences in the plasma proteome associated with the externalizing and internalizing subscales of SDQ**

To account for the SDQ subscales, we next analysed the plasma proteomic data separately for females and males in relation to the SDQ internalizing and externalizing subscales. The results of the analysis are presented in the Supplementary File 1. Figure 4 shows the UpSet plot of all the analyses of associations between the total SDQ scores, the externalizing and internalizing subscales of the SDQ, and the protein abundances.

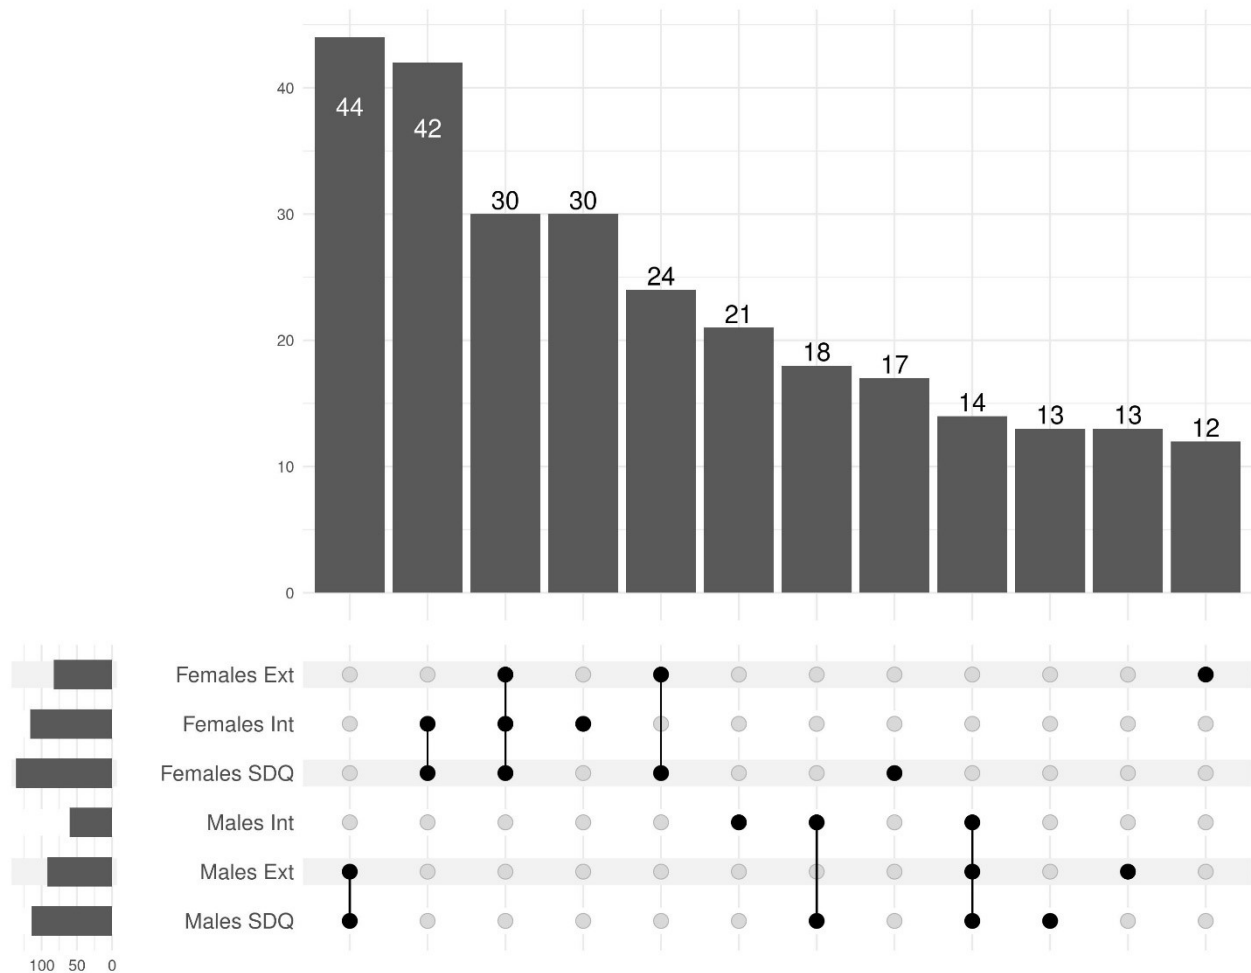

**Figure 4.** UpSet plot showing the significant proteome features associated with the SDQ score and its sub-scales in females and males. All the intersections with fewer than 10 proteins were removed for readability. The full plot is shown in supplementary figure 2.

The analysis showed that in males, most proteins in association with the total SDQ score were more closely associated with the SDQ externalising scores; 44 proteins were in common between these scores. On the contrary, in females, most proteins in association with the total SDQ score were more closely associated with the SDQ internalizing scores, with 42 common proteins. As the full SDQ is comprised of subscales, the clustering of significantly associated proteins was as expected. The enrichment analysis showed that for females, the proteins were significantly enriched in blood coagulation and complement cascade proteins, whereas no significant enrichment was observed for the male subset.

## 5. Discussion

In this study, we used untargeted LC-MS/MS plasma proteomics to explore the sex-specific associations between plasma protein abundances and mental health indicator scores in adolescents. Our findings provide insights into the proteomic differences of sex-specific psychological and behavioural traits during adolescence, revealing distinct and shared pathways linked to the Strengths and Difficulties Questionnaire (SDQ) scores.

In this study, we used untargeted LC-MS/MS plasma proteomics to investigate the sex-specific associations between plasma protein abundances and mental health indicator scores in adolescents. Overall, 37 proteins were significantly associated with the total SDQ score using the 197 adolescents participating in the WALNUTs cohort. Of all the 76 plasma proteins found to be associated with sex, there were four proteins (Vitronectin, Prothrombin, Ficolin 2, And Alpha-1B-Glycoprotein) that was shown to be associated with the SDQ in the sub-cohort [27]. This coupled with the knowledge that SDQ is sex-specific, motivated us to split the cohort by sex and investigate the associations of the plasma proteome with SDQ separately for females and males.

As splitting the cohort by sex inevitably decreases the power of the statistical analysis we opted to use nominal p-values for these analyses. The analyses of the split cohorts showed individual proteins to be significantly and sex-specifically associated with the total SDQ score; N-acetylgalactosaminyltransferase 7 in males, and prothrombin and antithrombin-III in females. In a previous study, the level of N-acetylgalactosaminyltransferase in the brain was connected to sex differences in depressive, anxious behaviours in a rat model [41]. The female-specific proteins both play a role in blood coagulation which has been previously linked to depression and anxiety [42], and is in line with our previous study [27]. The deregulation of blood coagulation proteins was previously reported to be associated with acute stress [43] and depression [44].

Our analyses did, however, reveal the levels of IGFBP2 to be significantly higher in males than in females, in line with results previously reported by Liu et al.[26]. Additionally, we found sex-hormone-binding globulin proteins to also be associated with sex, possibly connected to different levels of sex hormones, which is to be expected[45]. We also identified differences in proteins related to bone structure and ossification, which is consistent with the significant skeletal development occurring during puberty [46]. It was also shown, that although males tend to produce more inflammatory responses before puberty, after the puberty, inflammation is higher in females than in males [23], which makes the investigation of inflammation-associated pathways to be complicated in mixed-sex cohorts. Given that puberty also occurs at different ages for males and females, developmental differences can additionally influence protein abundances [47, 48], further emphasising the importance of analysing the sexes separately, even in an age-balanced cohorts like WALNUTs.

The shared proteins between sexes have the same direction of the association and similar size effects. We can assume that the 15 proteins common to both sexes and associated with the SDQ score play a role in the underlying differences between the low and high-SDQ individuals. Of these proteins, amyloid beta precursor like protein 1 (APLP1) and ficolin 2 were previously described as associated with SDQ [27]. When analysing the sex-specific associations we saw that the bulk of the proteins – 106 for females and 85 for males – were different. This suggests that distinct mechanisms

underlie the behavioural and psychological traits of each sex in addition to the shared ones. For females, proteins enriched in blood coagulation pathways and complement cascades were prominent, whereas males did not exhibit similar enrichment patterns.

When dissecting SDQ into externalizing and internalizing subscales, we observed that the proteomic associations in males were more closely linked to externalizing sub-score, while in females internalizing sub-score had more proteins in common with the full SDQ score. This aligns with behavioural research suggesting that males often exhibit more outward-directed behavioural challenges, while females are more prone to internalizing conditions such as anxiety and depression [11, 41]. The distinct sex-associated proteomic signatures reinforce the need to consider sex differences when evaluating biological markers for psychological and behavioural traits. The observation that SDQ subscales—externalizing in males and internalizing in females—show distinct proteomic signatures underscores the need for a nuanced approach to studying adolescent psychological development. The involvement of immune response pathways and the enrichment of blood coagulation proteins in females suggest that biological mechanisms underlying psychological traits may vary substantially between sexes. Immunological markers were previously associated with depression and anxiety symptoms, some authors suggesting a direct link between deregulation of immune response to depression [49, 50]. These findings provide a foundation for further investigations into the interplay between proteomic profiles, sex-specific development, and behavioural outcomes.

There exist some limitations in this study. First, the cohort contains only adolescents from a specific region of Spain. Although they are of quite similar age, the range is more than two years, which can be critical when investigating adolescents. In addition, the entire cohort was split into two for sex-specific analyses, which made the number of common proteins low and increased the analysis complexity. The second sequencing batch is homogenous with regards to SDQ, with most participants having low to moderate total SDQ scores, which makes the full cohort not much better at detecting associations with extreme SDQ values. Furthermore, the protein depletion method used in the plasma analyses affects the abundance estimation of multiple plasma proteins - other depletion methods can potentially yield more reliably detected proteins and improve repeatability [51]. Despite the limitations of this study, including a relatively homogeneous cohort and reduced statistical power in sex-specific analyses, the results pave the way for future research. Our findings emphasise the importance of analysing male and female proteomes separately to uncover distinct biological pathways, particularly those related to coagulation, immune responses, and psychological health.

Future investigations should focus on validating the results in independent sets of samples using larger, multi-cohort datasets to improve the reproducibility and usefulness of the found associations. The statistical power of the OMICs studies should also be considered when planning future work with cohorts. To improve the results analysing each sex separately may be a feasible way forward for analysing mental health, specifically in adolescents. Furthermore, integrating longitudinal data could reveal how proteomic profiles evolve during adolescence and their relationship with long-term psychological outcomes.

### **Data availability**

The data analysed in this study is subject to the following licenses/restrictions: The Walnuts data is not publicly available due to the restrictions of informed consent. The data contains personal information of children and according to the ethical approval, they should be kept confidential. Proteomics data is not publicly available due to the restrictions of informed consent. Reasonable requests to access these datasets should be directed to Katja Kanninen, University of Eastern Finland. To ensure the protection of privacy and compliance with national data protection legislation, a data use/transfer agreement is needed, the content and specific clauses of which will depend on the nature of the requested data.

### **Acknowledgements**

We gratefully acknowledge the contribution of the Early Environmental quality and life-course mental health effects (Equal-Life) project team, Ruth Koole and Rik Bogers (RIVM) in providing the selection protocol, the Turku Proteomics Facility team supported by Biocenter Finland for mass spectrometry, and the laboratory assistance of Ms. Mirka Tikkanen.

This WALNUTs project was supported by Instituto de Salud Carlos III through the projects ‘CP14/00108, PI16/00261, and PI21/00266’ (co-founded by the European Regional Development Fund ‘A way to make Europe’). JJ holds a Miguel Servet-II contract (grant CII19/00015) awarded by the Instituto de Salud Carlos III (co-founded by the European Social Fund “Investing in your future”). The California Walnut Commission (CWC) gave support by supplying the walnuts for free for the Walnuts Smart Snack Dietary Intervention Trial. The funders had no role in the study design, collection, management, analysis, and interpretation of data, the writing of the report, or the decision to submit it for publication.

### **Funding**

This project has received funding from the European Union’s Horizon 2020 research and innovation programme under grant agreement No 874724. Equal-Life is part of the European Human Exposome Network.

### **Author Contributions**

KMK, ISM, and IvK designed the study. IvK and JJ guided the selection process and provided the samples. AA performed statistical and bioinformatics analyses, pathway analysis, planning and literature analysis. AA, A-KP and KMK drafted the manuscript. All authors read and approved the final version of the manuscript.



## References

1. Steel Z, Marnane C, Iranpour C, Chey T, Jackson JW, Patel V, et al. The global prevalence of common mental disorders: a systematic review and meta-analysis 1980–2013. *Int J Epidemiol*. 2014;43:476–493.
2. Albert PR. Why is depression more prevalent in women? *J Psychiatry Neurosci*. 2015;40:219–221.
3. Asher M, Asnaani A, Aderka IM. Gender differences in social anxiety disorder: A review. *Clin Psychol Rev*. 2017;56:1–12.
4. Nolen-Hoeksema S. Gender Differences in Depression. *Curr Dir Psychol Sci*. 2001;10:173–176.
5. Goodman A. Scoring the Strengths & Difficulties Questionnaire for age 4-17 or 18+. 2016.
6. Goodman R, Meltzer H, Bailey V. The Strengths and Difficulties Questionnaire: a pilot study on the validity of the self-report version. *Int Rev Psychiatry*. 2003;15:173–177.
7. Goodman A, Goodman R. Population mean scores predict child mental disorder rates: validating SDQ prevalence estimators in Britain. *J Child Psychol Psychiatry*. 2011;52:100–108.
8. Else-Quest NM, Hyde JS, Goldsmith HH, Van Hulle CA. Gender differences in temperament: A meta-analysis. *Psychol Bull*. 2006;132:33–72.
9. van der Ende J, Verhulst FC, Tiemeier H. Agreement of informants on emotional and behavioral problems from childhood to adulthood. *Psychol Assess*. 2012;24:293–300.
10. Oltmanns JR, Smith GT, Oltmanns TF, Widiger TA. General Factors of Psychopathology, Personality, and Personality Disorder: Across Domain Comparisons. *Clin Psychol Sci*. 2018;6:581–589.
11. Caspi A, Houts RM, Belsky DW, Goldman-Mellor SJ, Harrington H, Israel S, et al. The p Factor: One General Psychopathology Factor in the Structure of Psychiatric Disorders? *Clin Psychol Sci*. 2014;2:119–137.
12. Eagly AH, Wood W. The Nature–Nurture Debates. *Perspect Psychol Sci*. 2013;8:340–357.
13. Chan RF, Copeland WE, Zhao M, Xie LY, Costello J, Aberg KA, et al. A methylation study implicates the rewiring of brain neural circuits during puberty in the emergence of sex differences in depression symptoms. *J Child Psychol Psychiatry*. 2021;63:802–809.
14. Jiang Y, Qin M, Teng T, Li X, Yu Y, Wang J, et al. Identification of Sex-Specific Plasma Biomarkers Using Metabolomics for Major Depressive Disorder in Children and Adolescents. *Front Psychiatry*. 2022;13.
15. Chen CC, Howie J, Ebrahimi M, Teymouri K, Woo JJ, Tiwari AK, et al. Analysis of the complement component C4 gene with schizophrenia subphenotypes. *Schizophr Res*. 2024;271:309–318.
16. Mittelstrass K, Ried JS, Yu Z, Krumsiek J, Gieger C, Prehn C, et al. Discovery of Sexual Dimorphisms in Metabolic and Genetic Biomarkers. *PLoS Genet*. 2011;7:e1002215.
17. E. D. Bekaert,\* P. Alaupovic,\* C. S. Knight-Gibson,\* G. Franceschini A, Sirtorir CR. Apolipoprotein A-I sex-related differences in the concentration and composition of apoA-I- and apoB-containing lipoprotein particles.
18. Curran AM, Fogarty Draper C, Scott-Boyer M-P, Valsesia A, Roche HM, Ryan MF, et al. Sexual Dimorphism, Age, and Fat Mass Are Key Phenotypic Drivers of Proteomic Signatures. *J Proteome Res*. 2017;16:4122–4133.
19. Miike K, Aoki M, Yamashita R, Takegawa Y, Saya H, Miike T, et al. Proteome profiling reveals gender

- differences in the composition of human serum. *Proteomics*. 2010;10:2678–2691.
20. The Emerging Risk Factors Collaboration. C-Reactive Protein, Fibrinogen, and Cardiovascular Disease Prediction. *N Engl J Med*. 2012;367:1310–1320.
  21. Titova OE, Yuan S, Byberg L, Baron JA, Lind L, Michaëlsson K, et al. Plasma proteome and incident myocardial infarction: sex-specific differences. *Eur Heart J*. 2024;45:4647–4657.
  22. Wilkinson NM, Chen H-C, Lechner MG, Su MA. Sex Differences in Immunity. *Annu Rev Immunol*. 2022;40:75–94.
  23. Klein SL, Flanagan KL. Sex differences in immune responses. *Nat Rev Immunol*. 2016;16:626–638.
  24. Xue X, Demirci D, Lenze EJ, Reynolds III CF, Mulsant BH, Wetherell JL, et al. Sex differences in plasma proteomic markers in late-life depression. *Psychiatry Res*. 2024;334:115773.
  25. Labonté B, Engmann O, Purushothaman I, Menard C, Wang J, Tan C, et al. Sex-specific transcriptional signatures in human depression. *Nat Med*. 2017;23:1102–1111.
  26. Liu C-W, Bramer L, Webb-Robertson B-J, Waugh K, Rewers MJ, Zhang Q. Temporal profiles of plasma proteome during childhood development. *J Proteomics*. 2017;152:321–328.
  27. de Sousa Maciel I, Piironen A-K, Afonin AM, Ivanova M, Alatalo A, Jadhav KK, et al. Plasma proteomics discovery of mental health risk biomarkers in adolescents. *Nat Ment Heal*. 2023;1:596–605.
  28. Afonin AM, Piironen A-K, de Sousa Maciel I, Ivanova M, Alatalo A, Whipp AM, et al. Proteomic insights into mental health status: plasma markers in young adults. *Transl Psychiatry*. 2024;14:55.
  29. Julvez J, Gignac F, Fernández-Barrés S, Romaguera D, Sala-Vila A, Ranzani OT, et al. Walnuts, Long-Chain Polyunsaturated Fatty Acids, and Adolescent Brain Development: Protocol for the Walnuts Smart Snack Dietary Intervention Trial. *Front Pediatr*. 2021;9.
  30. Pinar-Martí A, Fernández-Barrés S, Gignac F, Persavento C, Delgado A, Romaguera D, et al. Red blood cell omega-3 fatty acids and attention scores in healthy adolescents. *Eur Child Adolesc Psychiatry*. 2022. 12 August 2022. <https://doi.org/10.1007/s00787-022-02064-w>.
  31. Ignjatovic V, Geyer PE, Palaniappan KK, Chaaban JE, Omenn GS, Baker MS, et al. Mass Spectrometry-Based Plasma Proteomics: Considerations from Sample Collection to Achieving Translational Data. *J Proteome Res*. 2019;18:4085–4097.
  32. Bateman A, Martin M-J, Orchard S, Magrane M, Ahmad S, Alpi E, et al. UniProt: the Universal Protein Knowledgebase in 2023. *Nucleic Acids Res*. 2023;51:D523–D531.
  33. Frankenfield AM, Ni J, Ahmed M, Hao L. Protein Contaminants Matter: Building Universal Protein Contaminant Libraries for DDA and DIA Proteomics. *J Proteome Res*. 2022;21:2104–2113.
  34. Čuklina J, Lee CH, Williams EG, Sajic T, Collins BC, Rodríguez Martínez M, et al. Diagnostics and correction of batch effects in large-scale proteomic studies: a tutorial. *Mol Syst Biol*. 2021;17.
  35. Liu M, Dongre A. Proper imputation of missing values in proteomics datasets for differential expression analysis. *Brief Bioinform*. 2021;22.
  36. Peng H, Wang H, Kong W, Li J, Goh WW Bin. Optimizing differential expression analysis for proteomics data via high-performing rules and ensemble inference. *Nat Commun*. 2024;15:3922.
  37. Ritchie ME, Phipson B, Wu D, Hu Y, Law CW, Shi W, et al. limma powers differential expression analyses for RNA-sequencing and microarray studies. *Nucleic Acids Res*. 2015;43:e47–e47.

38. Szklarczyk D, Gable AL, Nastou KC, Lyon D, Kirsch R, Pyysalo S, et al. The STRING database in 2021: customizable protein–protein networks, and functional characterization of user-uploaded gene/measurement sets. *Nucleic Acids Res.* 2021;49:D605–D612.
39. Franceschini A, Szklarczyk D, Frankild S, Kuhn M, Simonovic M, Roth A, et al. STRING v9.1: protein-protein interaction networks, with increased coverage and integration. *Nucleic Acids Res.* 2012;41:D808–D815.
40. Wickham H. *ggplot2*. New York, NY: Springer New York; 2009.
41. Mehta NS, Wang L, Redei EE. Sex differences in depressive, anxious behaviors and hippocampal transcript levels in a genetic rat model. *Genes, Brain Behav.* 2013;12:695–704.
42. Dietrich-Muszalska A, Wachowicz B. Platelet haemostatic function in psychiatric disorders: Effects of antidepressants and antipsychotic drugs. *World J Biol Psychiatry.* 2017;18:564–574.
43. Zraggen L, Fischer JE, Mischler K, Preckel D, Kudielka BM, von Känel R. Relationship between hemoconcentration and blood coagulation responses to acute mental stress. *Thromb Res.* 2005;115:175–183.
44. Yu C, Zhang T, Shi S, Wei T, Wang Q. Potential biomarkers: differentially expressed proteins of the extrinsic coagulation pathway in plasma samples from patients with depression. *Bioengineered.* 2021;12:6318–6331.
45. Hammond GL. Plasma steroid-binding proteins: primary gatekeepers of steroid hormone action. *J Endocrinol.* 2016;230:R13–R25.
46. van der Eerden BCJ, Karperien M, Wit JM. Systemic and Local Regulation of the Growth Plate. *Endocr Rev.* 2003;24:782–801.
47. Blakemore S, Burnett S, Dahl RE. The role of puberty in the developing adolescent brain. *Hum Brain Mapp.* 2010;31:926–933.
48. Mauvais-Jarvis F. Sex differences in metabolic homeostasis, diabetes, and obesity. *Biol Sex Differ.* 2015;6:14.
49. Milaneschi Y, Kappelmann N, Ye Z, Lamers F, Moser S, Jones PB, et al. Association of inflammation with depression and anxiety: evidence for symptom-specificity and potential causality from UK Biobank and NESDA cohorts. *Mol Psychiatry.* 2021;26:7393–7402.
50. Branchi I, Poggini S, Capuron L, Benedetti F, Poletti S, Tamouza R, et al. Brain-immune crosstalk in the treatment of major depressive disorder. *Eur Neuropsychopharmacol.* 2021;45:89–107.
51. Ahsan N, Fornelli L, Najar FZ, Gamagedara S, Hossan MR, Rao RSP, et al. Proteomics evaluation of five economical commercial abundant protein depletion kits for enrichment of diseases-specific biomarkers from blood serum. *Proteomics.* 2023;23.

## Supplementary materials

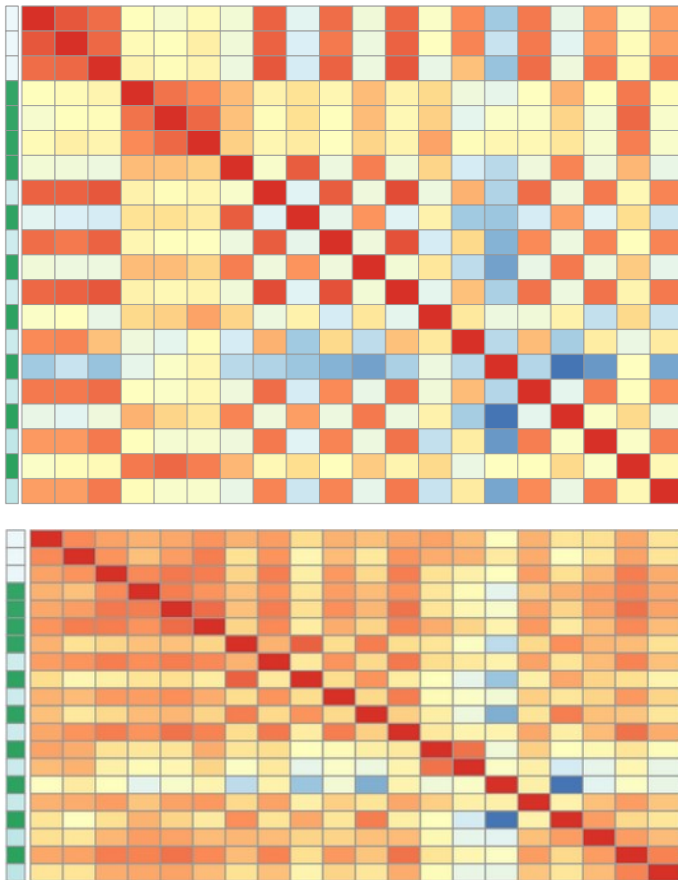

**Supplementary figure 1.** The heatmaps of sample correlations. A - samples before batch correction, B – samples after batch correction. The first 3 samples are from the first sequencing batch, the next 4 are from the second sequencing run, and the rest are repeating samples from the first batch followed by the second batch. Red signifies high correlation; blue signifies low correlation.

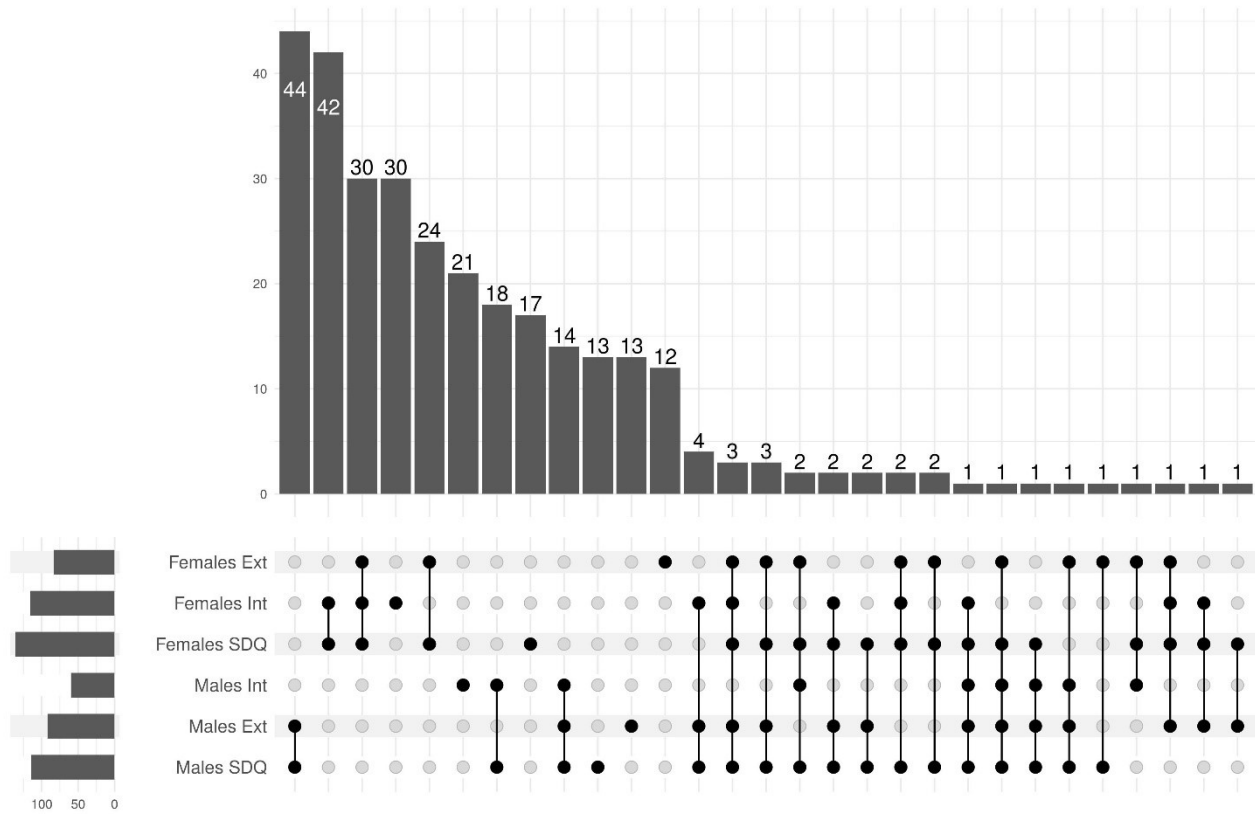

**Supplementary figure 2.** The full UpSet plot showing the significant proteins associated with the SDQ subscales in females and males.

**Supplementary table 1.** Proteins significantly associated with sex.

| Protein ID | Protein names                                              | Gene   | logFC  | P.Value | adj.P.Val |
|------------|------------------------------------------------------------|--------|--------|---------|-----------|
| O15335     | Chondroadherin                                             | CHAD   | -0.999 | <0.01   | <0.01     |
| O60462     | Neuropilin-2                                               | NRP2   | -0.352 | <0.01   | <0.01     |
| O75015     | Low affinity immunoglobulin gamma Fc region receptor III-B | FCGR3B | 0.243  | <0.01   | 0.032328  |
| P00734     | Prothrombin                                                | F2     | 0.234  | <0.01   | 0.044339  |
| P02452     | Collagen alpha-1(I) chain                                  | COL1A1 | -1.009 | <0.01   | <0.01     |
| P02458     | Collagen alpha-1(II) chain                                 | COL2A1 | -2.702 | <0.01   | <0.01     |
| P02750     | Leucine-rich alpha-2-glycoprotein                          | LRG1   | 0.311  | <0.01   | <0.01     |
| P02790     | Hemopexin                                                  | HPX    | 0.234  | <0.01   | <0.01     |
| P04004     | Vitronectin                                                | VTN    | 0.236  | <0.01   | <0.01     |
| P04070     | Vitamin K-dependent protein C                              | PROC   | 0.236  | <0.01   | <0.01     |
| P04217     | Alpha-1B-glycoprotein                                      | A1BG   | 0.222  | <0.01   | 0.01323   |
| P04278     | Sex hormone-binding globulin                               | SHBG   | 0.574  | <0.01   | <0.01     |

|        |                                                  |         |        |       |          |
|--------|--------------------------------------------------|---------|--------|-------|----------|
| P05090 | Apolipoprotein D                                 | APOD    | 0.260  | <0.01 | <0.01    |
| P05186 | Alkaline phosphatase, tissue-nonspecific isozyme | ALPL    | -1.298 | <0.01 | <0.01    |
| P05556 | Integrin beta-1                                  | ITGB1   | -0.242 | <0.01 | <0.01    |
| P05997 | Collagen alpha-2(V) chain                        | COL5A2  | -0.991 | <0.01 | 0.028979 |
| P06732 | Creatine kinase M-type                           | CKM     | -0.774 | <0.01 | <0.01    |
| P08123 | Collagen alpha-2(I) chain                        | COL1A2  | -0.710 | <0.01 | <0.01    |
| P0DJ18 | Serum amyloid A-1 protein                        | SAA1    | 0.851  | <0.01 | <0.01    |
| P10451 | Osteopontin                                      | SPP1    | -1.130 | <0.01 | <0.01    |
| P12109 | Collagen alpha-1(VI) chain                       | COL6A1  | -0.674 | <0.01 | <0.01    |
| P12110 | Collagen alpha-2(VI) chain                       | COL6A2  | -0.292 | <0.01 | 0.010758 |
| P12111 | Collagen alpha-3(VI) chain                       | COL6A3  | -0.298 | <0.01 | 0.020385 |
| P12821 | Angiotensin-converting enzyme                    | ACE     | -0.475 | <0.01 | 0.015109 |
| P13591 | Neural cell adhesion molecule 1                  | NCAM1   | -0.351 | <0.01 | <0.01    |
| P13671 | Complement component C6                          | C6      | 0.217  | <0.01 | 0.020702 |
| P13942 | Collagen alpha-2(XI) chain                       | COL11A2 | -1.560 | <0.01 | <0.01    |
| P14209 | CD99 antigen                                     | CD99    | -0.700 | <0.01 | <0.01    |
| P15144 | Aminopeptidase N                                 | ANPEP   | -0.327 | <0.01 | <0.01    |
| P16112 | Aggrecan core protein                            | ACAN    | -1.123 | <0.01 | <0.01    |
| P17301 | Integrin alpha-2                                 | ITGA2   | -0.595 | <0.01 | <0.01    |
| P20023 | Complement receptor type 2                       | CR2     | -0.318 | <0.01 | 0.010679 |
| P20908 | Collagen alpha-1(V) chain                        | COL5A1  | -1.146 | <0.01 | <0.01    |
| P23471 | Receptor-type tyrosine-protein phosphatase zeta  | PTPRZ1  | -1.115 | <0.01 | <0.01    |
| P24821 | Tenascin                                         | TNC     | -0.304 | <0.01 | 0.020385 |
| P27487 | Dipeptidyl peptidase 4                           | DPP4    | -0.821 | <0.01 | <0.01    |
| P35443 | Thrombospondin-4                                 | THBS4   | -0.739 | <0.01 | <0.01    |
| P48745 | CCN family member 3                              | CCN3    | -1.740 | <0.01 | <0.01    |
| P49747 | Cartilage oligomeric matrix protein              | COMP    | -0.451 | <0.01 | <0.01    |
| P51884 | Lumican                                          | LUM     | -0.307 | <0.01 | <0.01    |
| Q08830 | Fibrinogen-like protein 1                        | FGL1    | 0.504  | <0.01 | <0.01    |
| Q12884 | Prolyl endopeptidase FAP                         | FAP     | -0.802 | <0.01 | <0.01    |
| Q13103 | Secreted phosphoprotein 24                       | SPP2    | 0.278  | <0.01 | 0.03431  |
| Q13867 | Bleomycin hydrolase                              | BLMH    | -0.675 | <0.01 | <0.01    |
| Q14314 | Fibroleukin                                      | FGL2    | -0.244 | <0.01 | 0.032039 |
| Q14624 | Inter-alpha-trypsin inhibitor heavy chain H4     | ITIH4   | 0.245  | <0.01 | 0.032039 |
| Q15063 | Periostin                                        | POSTN   | -0.462 | <0.01 | <0.01    |
| Q15113 | Procollagen C-endopeptidase enhancer 1           | PCOLCE  | -0.394 | <0.01 | <0.01    |
| Q15465 | Sonic hedgehog protein                           | SHH     | -0.929 | <0.01 | <0.01    |

|         |                                                          |         |        |       |          |
|---------|----------------------------------------------------------|---------|--------|-------|----------|
| Q15485  | Ficolin-2                                                | FCN2    | -0.340 | <0.01 | 0.019441 |
| Q6EMK4  | Vasorin                                                  | VASN    | -0.250 | <0.01 | 0.018093 |
| Q6UXB8  | Peptidase inhibitor 16                                   | PI16    | -0.311 | <0.01 | <0.01    |
| Q7Z7G0  | Target of Nesh-SH3                                       | ABI3BP  | -0.295 | <0.01 | <0.01    |
| Q8IUUK5 | Plexin domain-containing protein 1                       | PLXDC1  | -0.639 | <0.01 | <0.01    |
| Q8IUL8  | Cartilage intermediate layer protein 2                   | CILP2   | -0.316 | <0.01 | <0.01    |
| Q8NBP7  | Proprotein convertase subtilisin/kexin type 9            | PCSK9   | 0.343  | <0.01 | <0.01    |
| Q8NDA2  | Hemicentin-2                                             | HMCN2   | -0.599 | <0.01 | <0.01    |
| Q92823  | Neuronal cell adhesion molecule                          | NRCAM   | -0.197 | <0.01 | 0.020562 |
| Q96KG7  | Multiple epidermal growth factor-like domains protein 10 | MEGF10  | -0.612 | <0.01 | <0.01    |
| Q96S96  | Phosphatidylethanolamine-binding protein 4               | PEBP4   | -0.314 | <0.01 | <0.01    |
| Q99715  | Collagen alpha-1(XII) chain                              | COL12A1 | -0.962 | <0.01 | <0.01    |
| Q99983  | Osteomodulin                                             | OMD     | -1.056 | <0.01 | <0.01    |
| Q9BXJ4  | Complement C1q tumor necrosis factor-related protein 3   | C1QTNF3 | -0.864 | <0.01 | <0.01    |
| Q9BY67  | Cell adhesion molecule 1                                 | CADM1   | -0.390 | <0.01 | <0.01    |
| Q9BYJ0  | Fibroblast growth factor-binding protein 2               | FGFBP2  | -0.555 | <0.01 | <0.01    |
| Q9GZT8  | NIF3-like protein 1                                      | NIF3L1  | -0.880 | <0.01 | 0.027205 |
| Q9H6X2  | Anthrax toxin receptor 1                                 | ANTXR1  | -0.464 | <0.01 | <0.01    |
| Q9HCU0  | Endosialin                                               | CD248   | -0.455 | <0.01 | <0.01    |
| Q9NPH3  | Interleukin-1 receptor accessory protein                 | IL1RAP  | 0.293  | <0.01 | 0.044194 |
| Q9NPY3  | Complement component C1q receptor                        | CD93    | -0.476 | <0.01 | <0.01    |
| Q9NQ76  | Matrix extracellular phosphoglycoprotein                 | MEPE    | -1.207 | <0.01 | 0.016501 |
| Q9UBG0  | C-type mannose receptor 2                                | MRC2    | -0.485 | <0.01 | <0.01    |
| Q9UBQ6  | Exostosin-like 2                                         | EXTL2   | -0.441 | <0.01 | <0.01    |
| Q9UM47  | Neurogenic locus notch homolog protein 3                 | NOTCH3  | -0.247 | <0.01 | 0.010758 |
| Q9UQP3  | Tenascin-N                                               | TNN     | -0.420 | <0.01 | <0.01    |
| Q9Y6R7  | IgGfc-binding protein                                    | FCGBP   | 0.326  | <0.01 | 0.010849 |
